## **Reversed functional topology in the antennal lobe of the male European corn borer**

Z. Kárpáti, T. Dekker and B. S. Hansson

10.1242/jeb.025049

There was an error published in *J. Exp. Biol.* **211**, 2841-2848.

The accepted date should have read 4 July 2008 not 4 July 2007.

We apologise to the authors for this error.
